# Supplementary material
Source: Springer Nature journal article supplement (https://www.springermedizin.de/resource/supplementary/12885_2007_964_MOESM2_ESM.pdf/9471376)

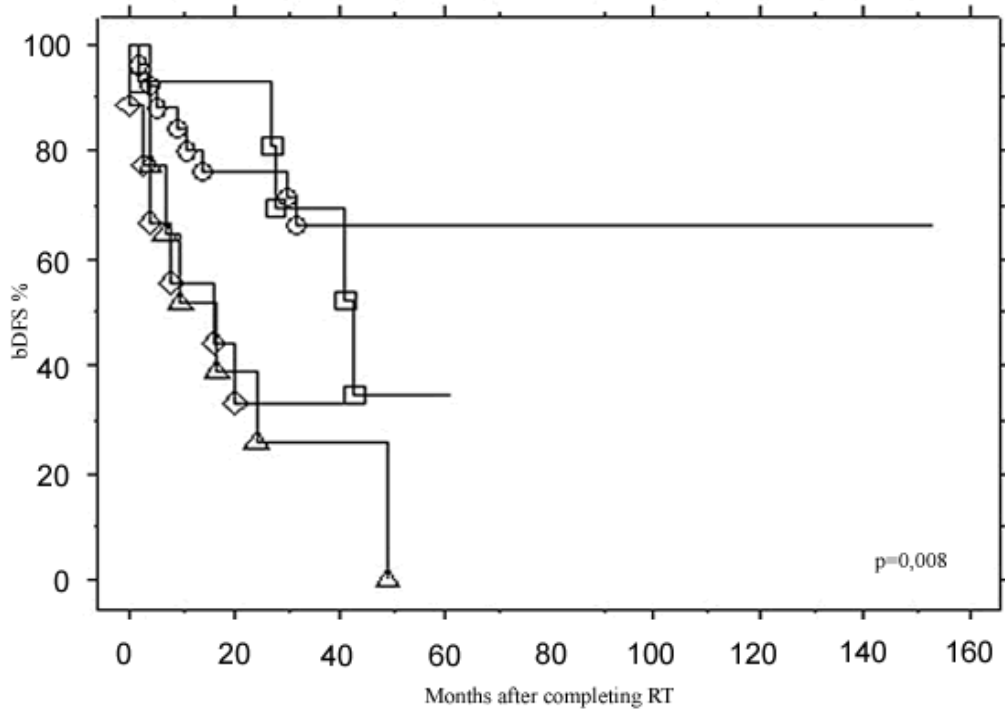

Supplement: MOESM2 [file 9471376]
